# Supplementary material for: Multi-scale data on intertidal macrobenthic biodiversity and environmental features in three New Zealand harbours
Source: Copernicus journal article supplement (doi:10.5194/essd-2019-151), 2019-09-16

# ***Interactive comment on “Multi-scale data on intertidal macrobenthic biodiversity and environmental features in three New Zealand harbours” by Casper Kraan et al.***

**Olivier Beauchard**

olivier.beauchard@nioz.nl

Received and published: 17 December 2019

## GENERAL COMMENTS

The data base provided by the authors is perfectly in line with current research needs in marine benthic ecology, especially regarding spatial scale-dependent processes. Its scientific value is strongly supported by high quality papers. The description of the data base, including biotic and abiotic aspects, is clearly detailed in the manuscript. In its present version, I think that this work is publishable, after a minor clarification (specific comments).

Printer-friendly version

Discussion paper

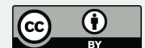

## SPECIFIC COMMENTS

I have only one minor comment. In the recent years, the World Register of Marine Species (<http://www.marinespecies.org/index.php>) has gained increasing authority in providing valid scientific names of marine species. In order to facilitate international data sharing and ensure standardisation, I think that the authors should ensure scientific name checking.

## TECHNICAL CORRECTIONS

I did not find any technical correction to be done.

---

Interactive comment on Earth Syst. Sci. Data Discuss., <https://doi.org/10.5194/essd-2019-151>, 2019.

Printer-friendly version

Discussion paper

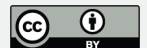

Supplement: Supplementary file [file essd-2019-151-RC1-supplement.pdf]
